# Supplementary material for: Incorporation of a boryl pendant as the trigger in a methacrylate polymer for backbone degradation
Source: Royal Society of Chemistry journal article supplement (doi:10.1039/d2cc04882e), 2022-01-01
Supplement: d2cc04882e1.pdf [file d2cc04882e1.pdf]

*Supplementary Information for*

**Incorporation of a boryl pendant as the trigger in a methacrylate polymer for backbone degradation**

Hiroshi Makino, Tsuyoshi Nishikawa\* and Makoto Ouchi\*

Department of Polymer Chemistry, Graduate School of Engineering, Kyoto University,  
Kyoto 606-8501, Japan  
615-8510, Japan

\*To whom correspondence should be addressed.

E-mail: nishikawa.tsuyoshi.8n@kyoto-u.ac.jp  
ouchi.makoto.2v@kyoto-u.ac.jp

**Contents**

|                                                                      |           |
|----------------------------------------------------------------------|-----------|
| <b>1 General .....</b>                                               | <b>2</b>  |
| <b>2 Experimental Procedures.....</b>                                | <b>2</b>  |
| <b>3 Results of RAFT copolymerization.....</b>                       | <b>3</b>  |
| <b>4 Results of Degradation of Poly(alkenylboronate-co-MMA).....</b> | <b>5</b>  |
| <b>5 Thermal Properties of Obtained Polymers .....</b>               | <b>12</b> |

## 1 General

All reactions were carried out with magnetic stirring under a nitrogen or an argon atmosphere unless stated otherwise.  $^1\text{H}$  NMR spectra were recorded on a JEOL JNM-ECA500 operating at 500.16 MHz ( $^1\text{H}$ ) at ambient temperature.  $^1\text{H}$  NMR data are reported on the basis of the chemical shift in ppm downfield from tetramethylsilane ( $\delta$  scale). The number-average molecular weight ( $M_n$ ), peak top molecular weight ( $M_p$ ), and molecular weight distribution ( $M_w/M_n$ ) of polymers were measured by HCL-8320GPC (TOSOH) at 40 °C in THF as an eluent on two polystyrene-gel columns (Shodex LF-404) at 0.35 mL/min of flow rate. The columns were calibrated against PMMA standard samples (PSS ReadyCal-Kit; Poly(methyl methacrylate),  $M_p = 800\text{-}2200000$ ). Differential scanning calorimetry (DSC) was performed for polymer samples (ca. 3-6 mg in aluminum pan) under dry nitrogen flow on DSCQ200 calorimeter (TA Instruments) equipped with RCS 90 electric freezing machine. Heating and cooling of the samples were repeated at 10 °C/min between 0 °C and 150 °C and the data on the second heating was employed for the  $T_g$  evaluation. The second heating scans were employed as data in the work. Thermogravimetric analysis (TGA) of polymer samples (ca. 5-6 mg in aluminum pan) was performed under dry nitrogen flow on a STA 2500 *Regulus* (NETZSCH). Heating of the samples were repeated at 10 °C/min between 20 °C and 500 °C.  $T_{d5}$  was the temperature of 5% weight loss. Vinylboronic acid pinacol ester (VBpin), isopropenylboronic acid pinacol ester (IPBpin), methyl methacrylate (MMA) and tetralin were purified by distillation prior to use. Azobisisobutyronitrile (AIBN), 2-Cyano-2-propyl dodecyl trithiocarbonate (CPDT), tetrabutylammonium fluoride trihydrate (TBAF  $\cdot$  3H<sub>2</sub>O), 4-*tert*-butylpyrocatechol (TBC), manganese(III) acetate dihydrate (Mn(OAc)<sub>3</sub>  $\cdot$  2H<sub>2</sub>O), *tert*-butylhydroquinone (TBHQ), 2,2,6,6-tetramethylpiperidine 1-oxyl (TEMPO) and dehydrated toluene were purchased from the commercial sources and were used without further purification.

## 2 Experimental Procedures

### RAFT copolymerization of alkenylboronates with MMA

The typical procedure for the copolymerization of alkenylboronates with MMA is as follows. A toluene solution of AIBN (205  $\mu\text{L}$ , 2.05 mg, 12.5  $\mu\text{mol}$ ), tetralin (34.1  $\mu\text{L}$ , 33.1 mg, 250  $\mu\text{mol}$ , internal standard), CPDT (8.73  $\mu\text{L}$ , 8.64 mg, 25.0  $\mu\text{mol}$ ), VBpin (107  $\mu\text{L}$ , 96.3 mg, 630  $\mu\text{mol}$ ), MMA (466  $\mu\text{L}$ , 438 mg, 4.38 mmol), and toluene (429  $\mu\text{L}$ ) were placed in a Schlenk tube having PTFE stopcock (J. Young) at room temperature under Ar ( $[\text{VBpin}]_0/[\text{MMA}]_0/[\text{CPDT}]_0/[\text{AIBN}] = 500/3500/20/10$  mM condition). The reaction solution was stirred at 60 °C in an oil bath. The polymerization solution was taken at predetermined intervals for analyses by SEC and  $^1\text{H}$  NMR. Monomer conversion was determined by  $^1\text{H}$  NMR from the peak area of olefinic protons of the monomer with tetralin as an internal standard. The polymer was purified by preparative SEC (CHCl<sub>3</sub> as eluent) and the degrees of polymerization of VBpin and MMA were analyzed by  $^1\text{H}$  NMR. The copolymerization of IPBpin with MMA and homopolymerization of MMA were performed in the similar way.

### Degradation of poly(alkenylboronate-co-MMA)

The typical procedure for degradation of poly(alkenylboronate-co-MMA) is as follows. Poly(VBpin-co-MMA) (50 mg, Bpin unit = 36.0  $\mu\text{mol}$ ), TBAF  $\cdot$  3H<sub>2</sub>O (13.6 mg, 43.2  $\mu\text{mol}$ ),

Mn(OAc)<sub>3</sub>·2H<sub>2</sub>O (9.7 mg, 36.0 μmol), TBC (29.9 mg, 180 μmol), and toluene (511 μL) were placed in a Schlenk tube having PTFE stopcock (J. Young) at room temperature under Ar ([Bpin unit]<sub>0</sub>/[TBAF]<sub>0</sub>/[Mn(OAc)<sub>3</sub>]<sub>0</sub>/[TBC]<sub>0</sub> = 70/85/70/352 mM condition). The reaction solution was stirred at 120 °C in an oil bath for 24 h. The reaction was terminated by cooling to room temperature. The reaction mixture was diluted with CHCl<sub>3</sub>, and washed with brine (5 mL × 3). The organic layer was filtered by aluminum oxide 90 active basic to remove Mn salt. The resultant solution was evaporated to remove solvents and the residue was analyzed by SEC.

### 3 Results of RAFT copolymerization

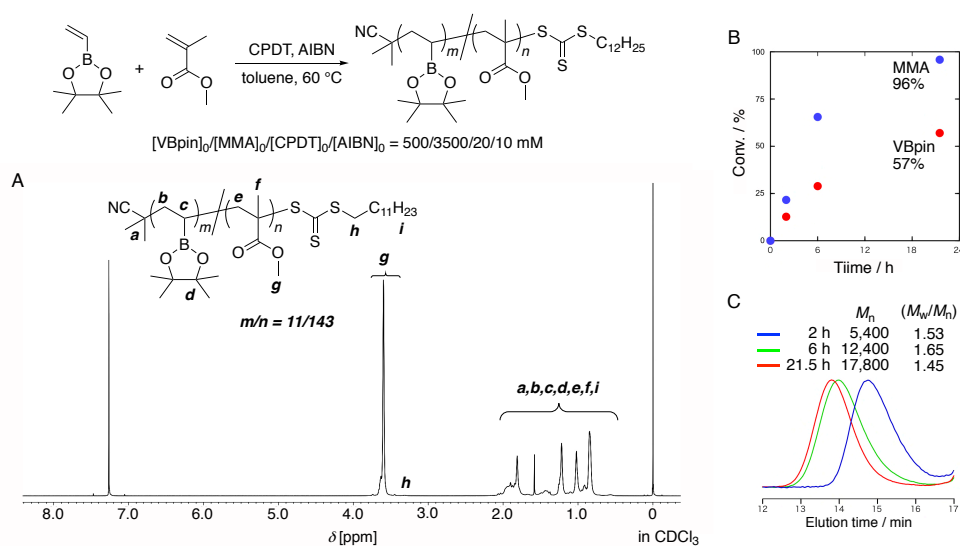

**Figure S1.** RAFT copolymerization of VBpin and MMA. (A) <sup>1</sup>H NMR spectrum of poly(VBpin-co-MMA) in CDCl<sub>3</sub> after purification. (B) Time-conversion curves. (C) Time-course SEC traces in the copolymerization.

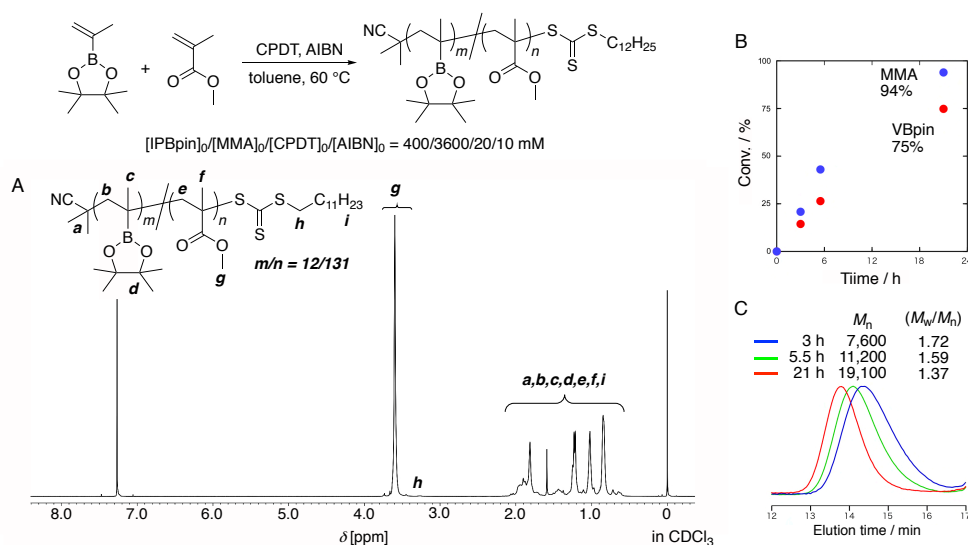

**Figure S2.** RAFT copolymerization of IPBpin and MMA. (A) <sup>1</sup>H NMR spectrum of poly(IPBpin-co-MMA) in CDCl<sub>3</sub> after purification. (B) Time-conversion curves. (C) Time-course SEC traces in the copolymerization.



## 4 Results of Degradation of Poly(alkenylboronate-*co*-MMA)

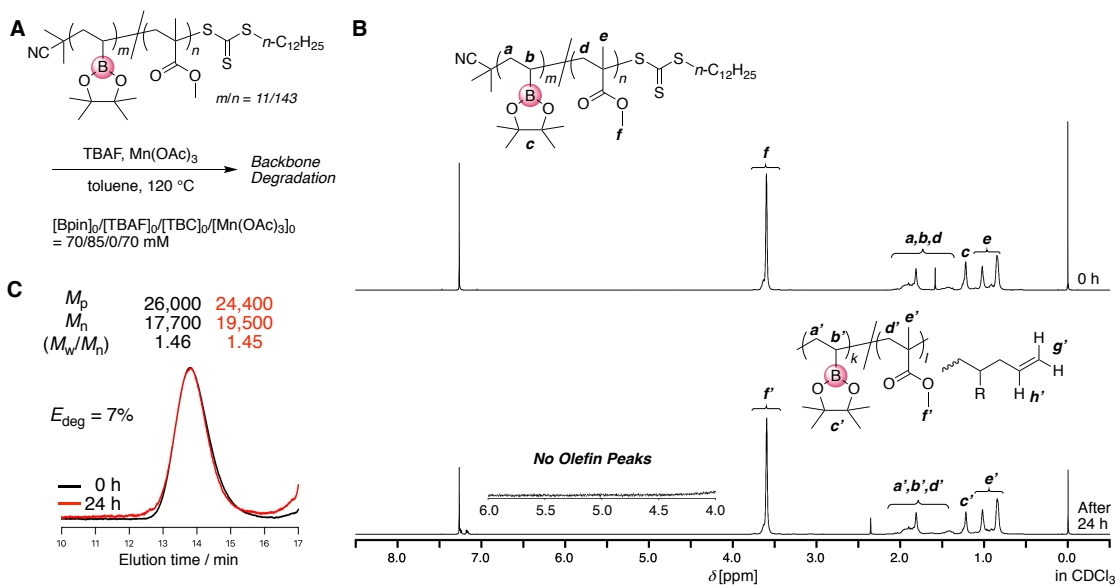

**Figure S4.** (A) Reaction condition for the degradation of poly(VBpin-*co*-MMA) (run 1 in Table 1). (B)  $^1\text{H}$  NMR spectra of the precursor (upper) and the resultant polymer (bottom). (C) SEC traces of the precursor (black) and the resultant polymer (red).

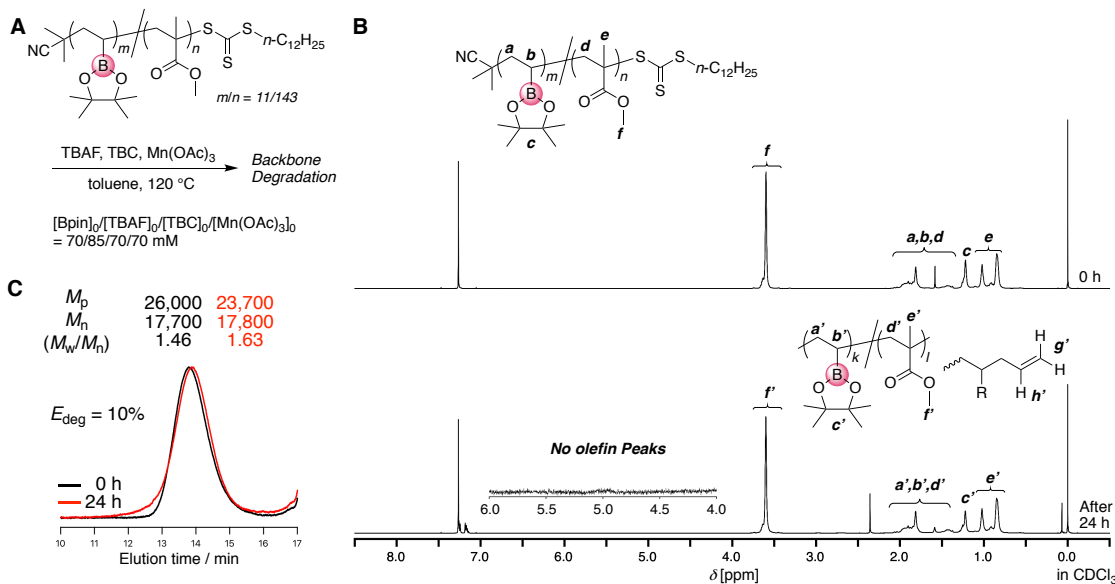

**Figure S5.** (A) Reaction condition for the degradation of poly(VBpin-*co*-MMA) (run 2 in Table 1). (B)  $^1\text{H}$  NMR spectra of the precursor (upper) and the resultant polymer (bottom). (C) SEC traces of the precursor (black) and the resultant polymer (red).

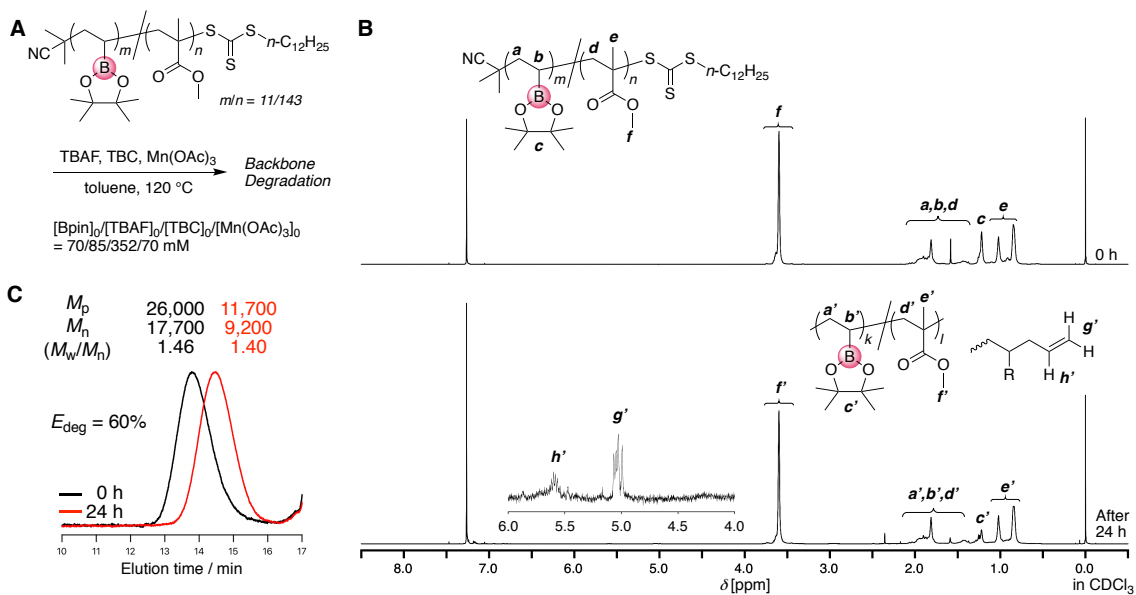

**Figure S6.** (A) Reaction condition for the degradation of poly(VBpin-co-MMA) (run 3 in Table 1). (B)  $^1\text{H}$  NMR spectra of the precursor (upper) and the resultant polymer (bottom). (C) SEC traces of the precursor (black) and the resultant polymer (red).

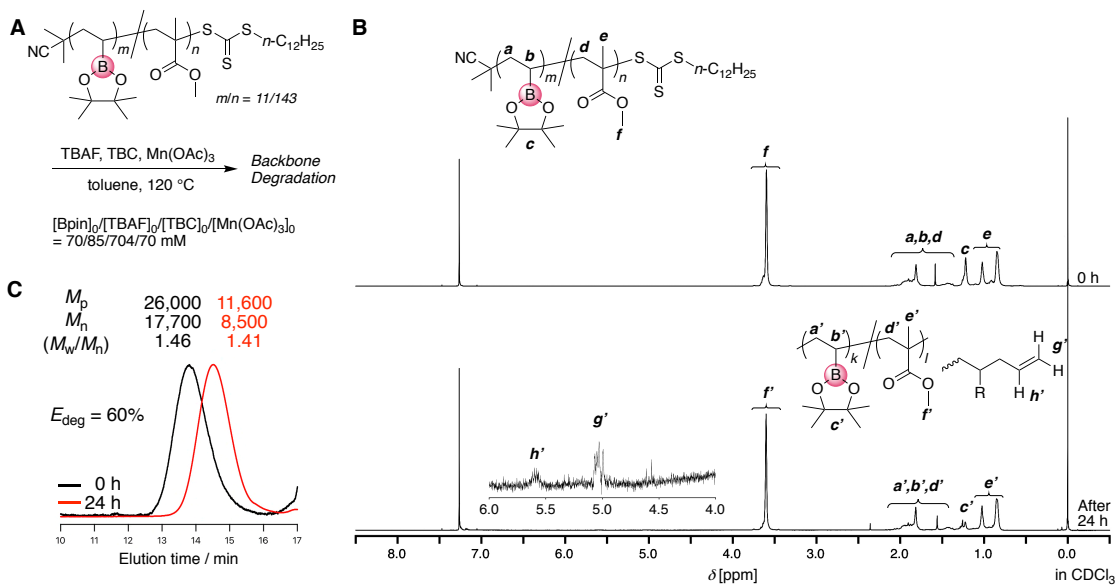

**Figure S7.** (A) Reaction condition for the degradation of poly(VBpin-co-MMA) (run 4 in Table 1). (B)  $^1\text{H}$  NMR spectra of the precursor (upper) and the resultant polymer (bottom). (C) SEC traces of the precursor (black) and the resultant polymer (red).

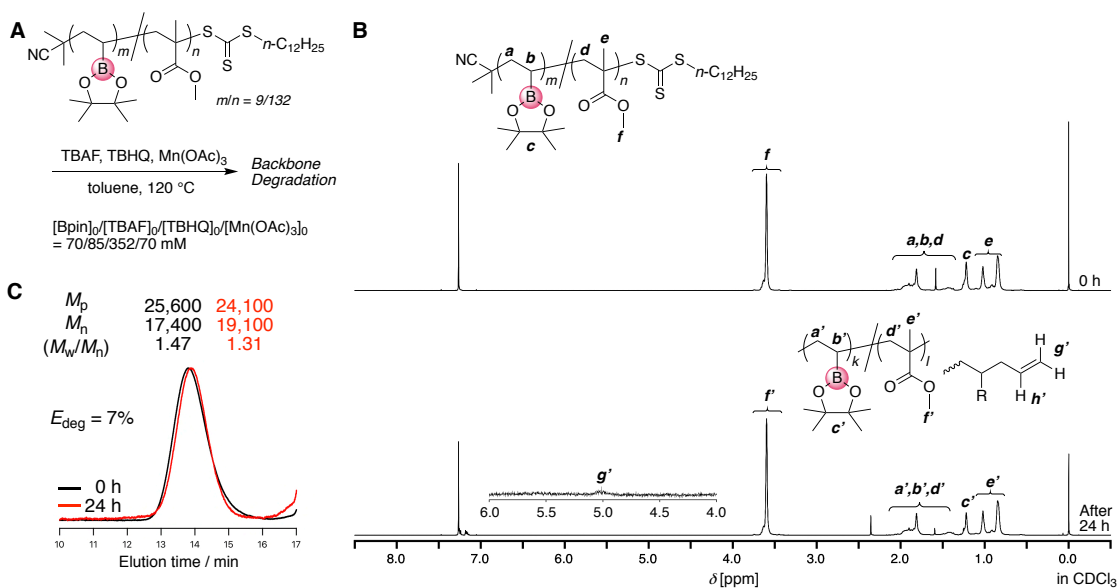

**Figure S8.** (A) Reaction condition for the degradation of poly(VBpin-co-MMA) (run 5 in Table 1). (B) <sup>1</sup>H NMR spectra of the precursor (upper) and the resultant polymer (bottom). (C) SEC traces of the precursor (black) and the resultant polymer (red).

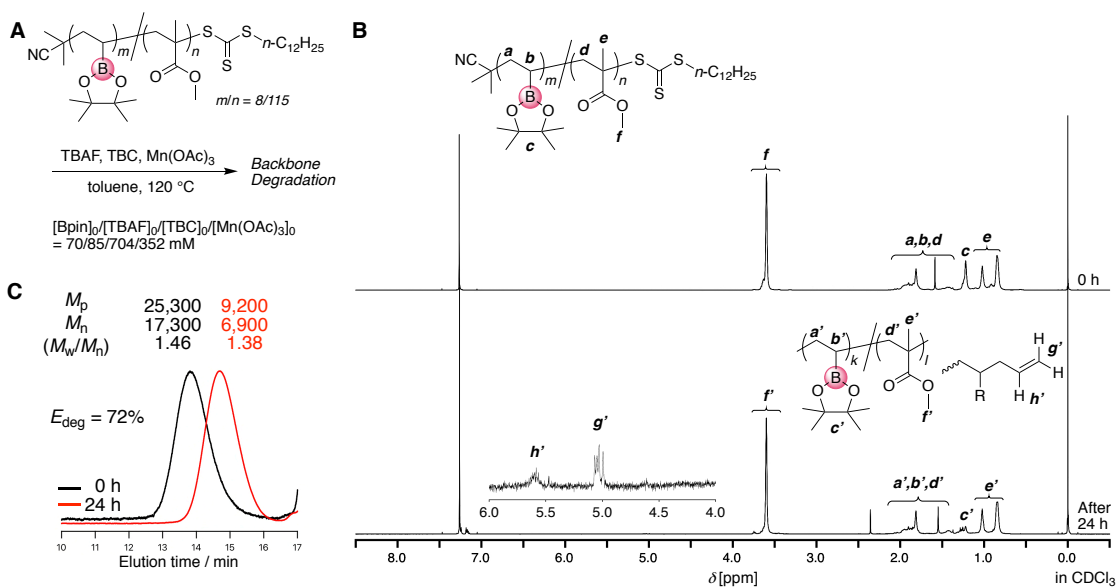

**Figure S9.** (A) Reaction condition for the degradation of poly(VBpin-co-MMA) (run 6 in Table 1). (B) <sup>1</sup>H NMR spectra of the precursor (upper) and the resultant polymer (bottom). (C) SEC traces of the precursor (black) and the resultant polymer (red).

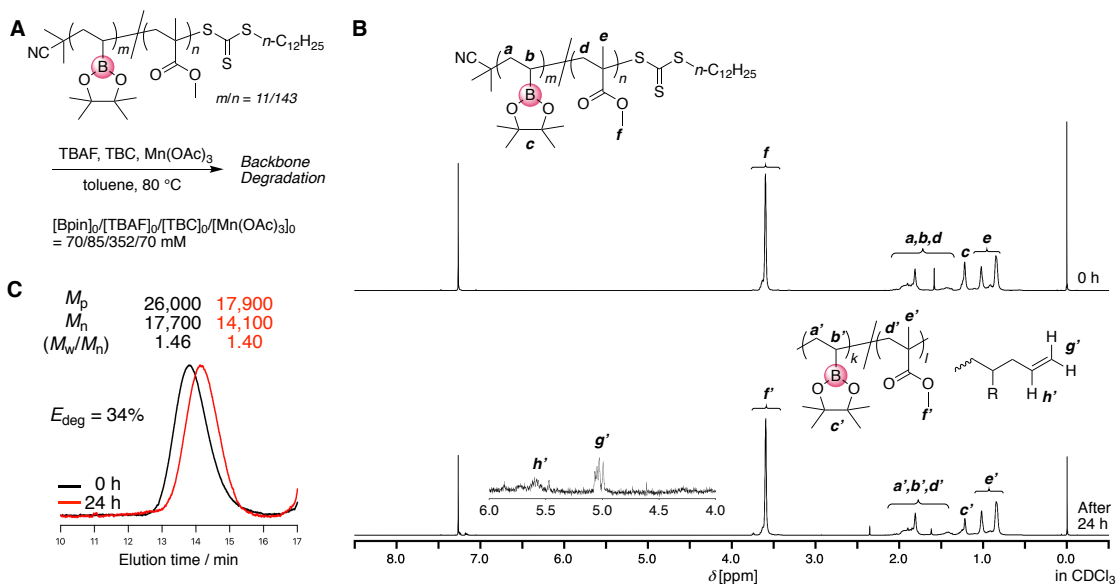

**Figure S10.** (A) Reaction condition for the degradation of poly(VBpin-co-MMA) at 80 °C. (B) <sup>1</sup>H NMR spectra of the precursor (upper) and the resultant polymer (bottom). (C) SEC traces of the precursor (black) and the resultant polymer (red).

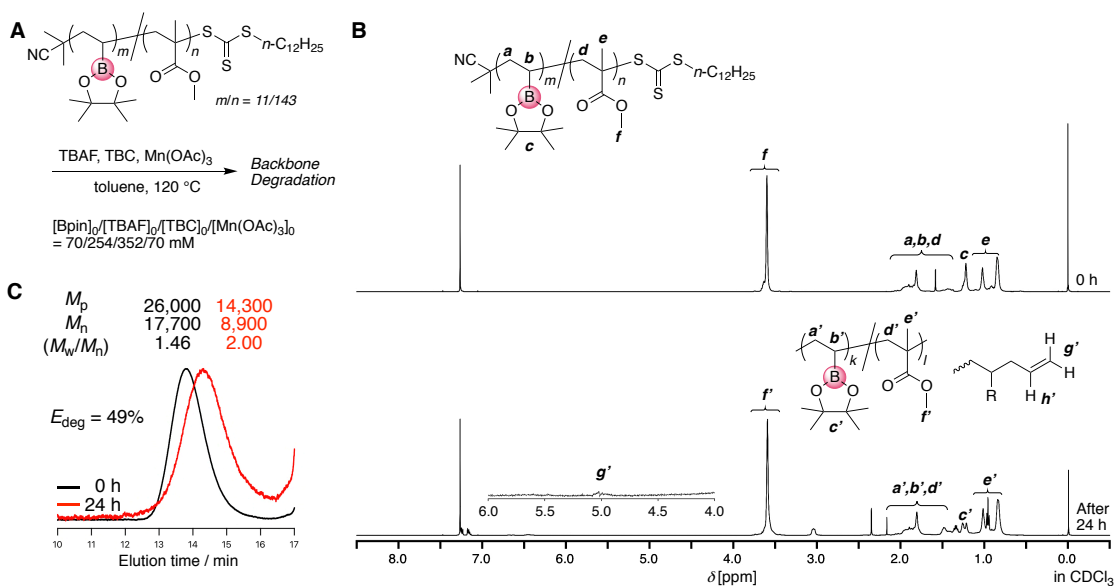

**Figure S11.** (A) Reaction condition for the degradation of poly(VBpin-co-MMA) with TBAF (3.6 eq.). (B) <sup>1</sup>H NMR spectra of the precursor (upper) and the resultant polymer (bottom). (C) SEC traces of the precursor (black) and the resultant polymer (red).



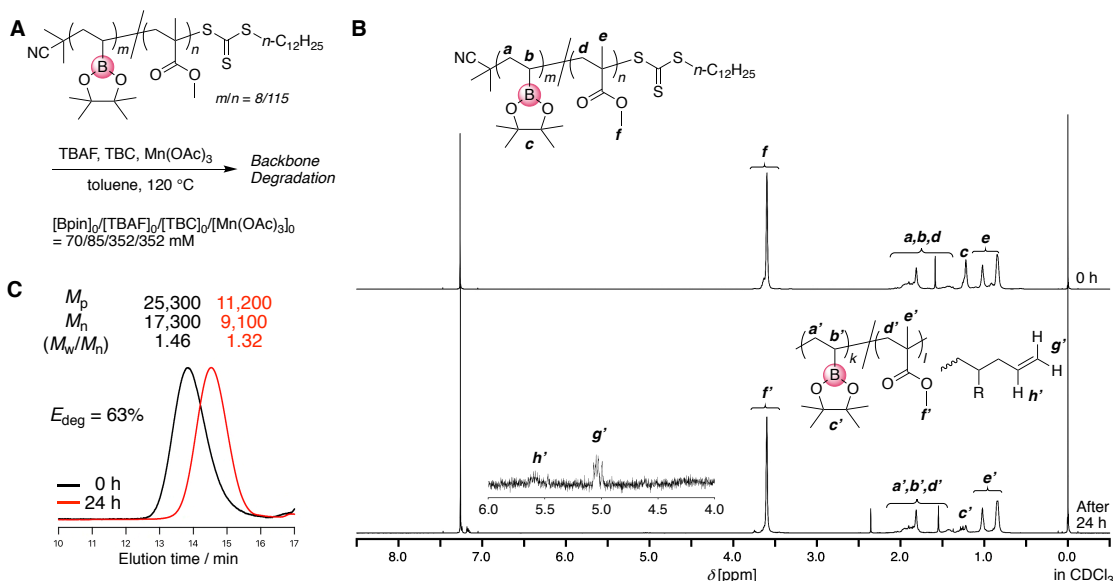

**Figure S12.** (A) Reaction condition for the degradation of poly(VBpin-co-MMA) with Mn(OAc)<sub>3</sub> (5.0 eq.). (B) <sup>1</sup>H NMR spectra of the precursor (upper) and the resultant polymer (bottom). (C) SEC traces of the precursor (black) and the resultant polymer (red).

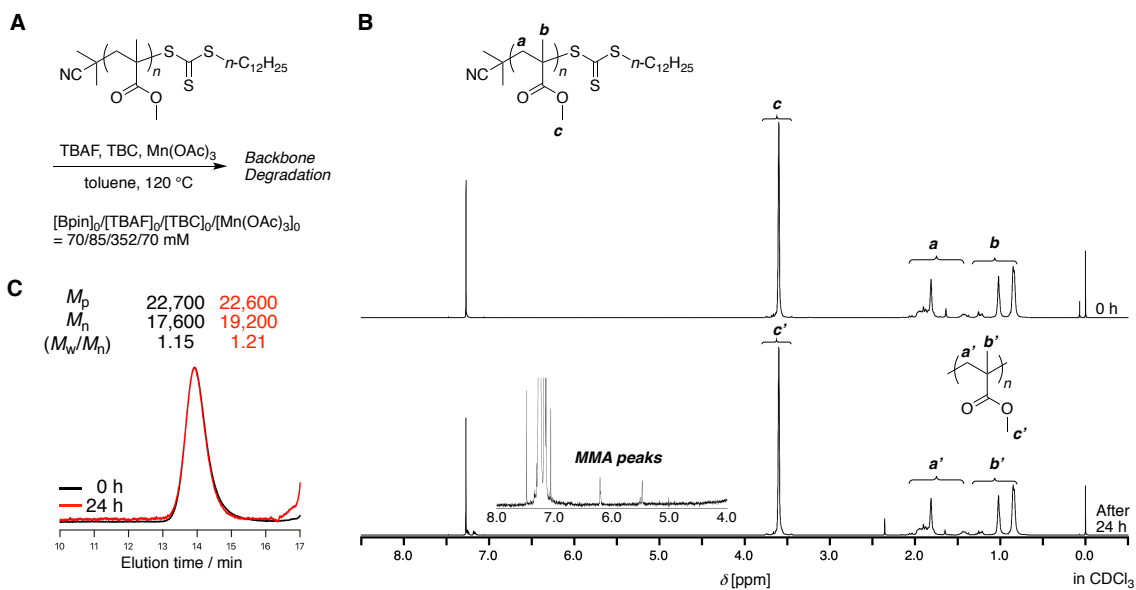

**Figure S13.** (A) Reaction condition for the degradation of PMMA (Figure 2C). (B) <sup>1</sup>H NMR spectra of the precursor (upper) and the resultant polymer (bottom). (C) SEC traces of the precursor (black) and the resultant polymer (red).

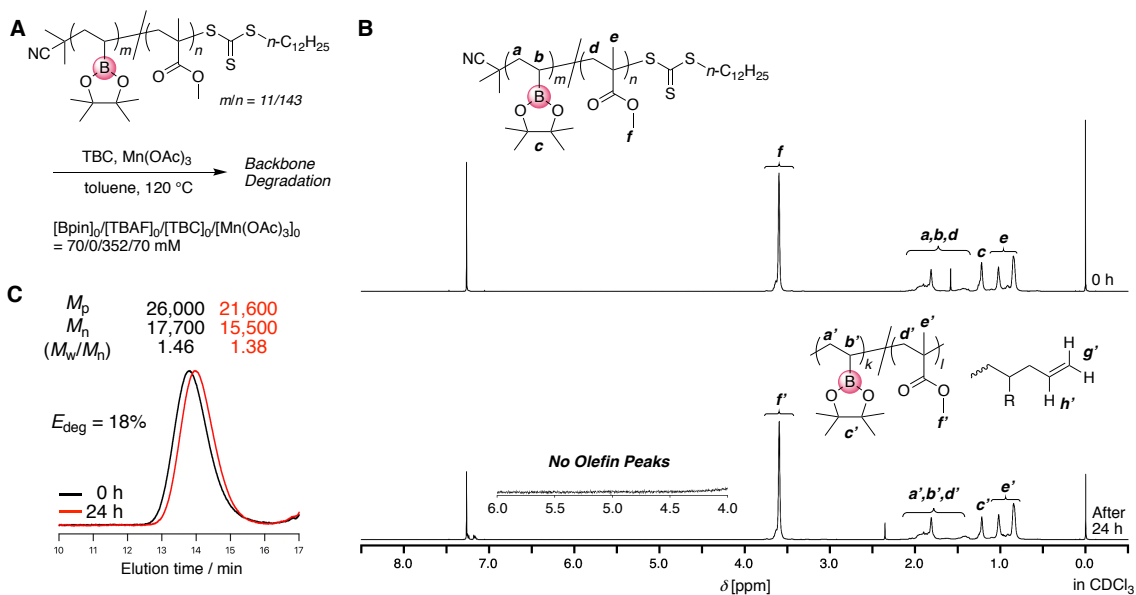

**Figure S14.** (A) Reaction condition for the degradation of poly(VBpin-*co*-MMA) (Figure 2D). (B)  $^1\text{H}$  NMR spectra of the precursor (upper) and the resultant polymer (bottom). (C) SEC traces of the precursor (black) and the resultant polymer (red).

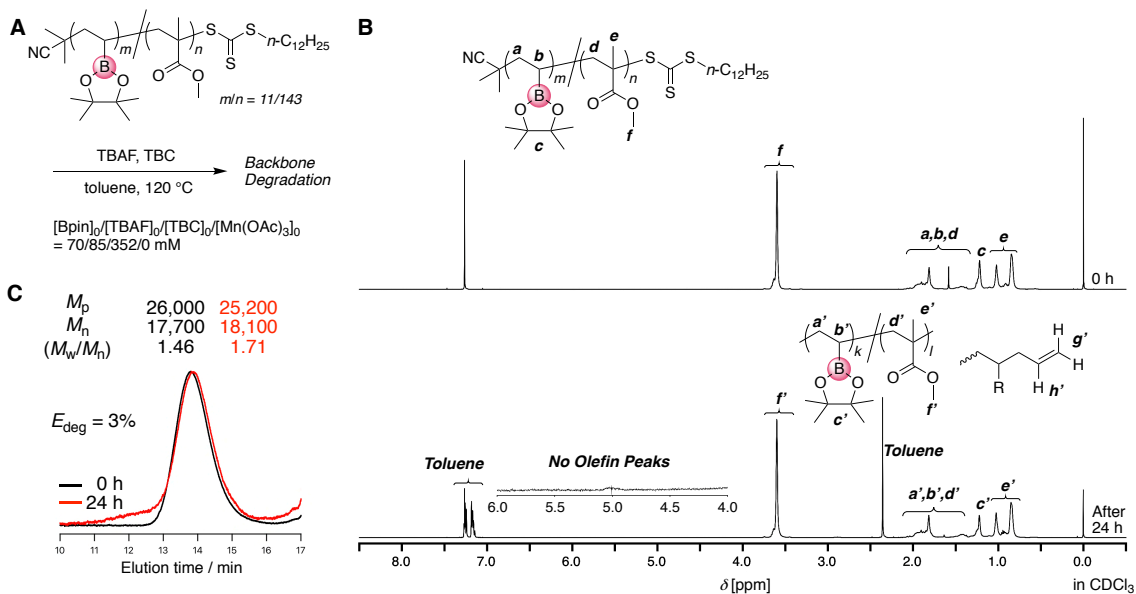

**Figure S15.** (A) Reaction condition for the degradation of poly(VBpin-*co*-MMA) (Figure 2E). (B)  $^1\text{H}$  NMR spectra of the precursor (upper) and the resultant polymer (bottom). (C) SEC traces of the precursor (black) and the resultant polymer (red).

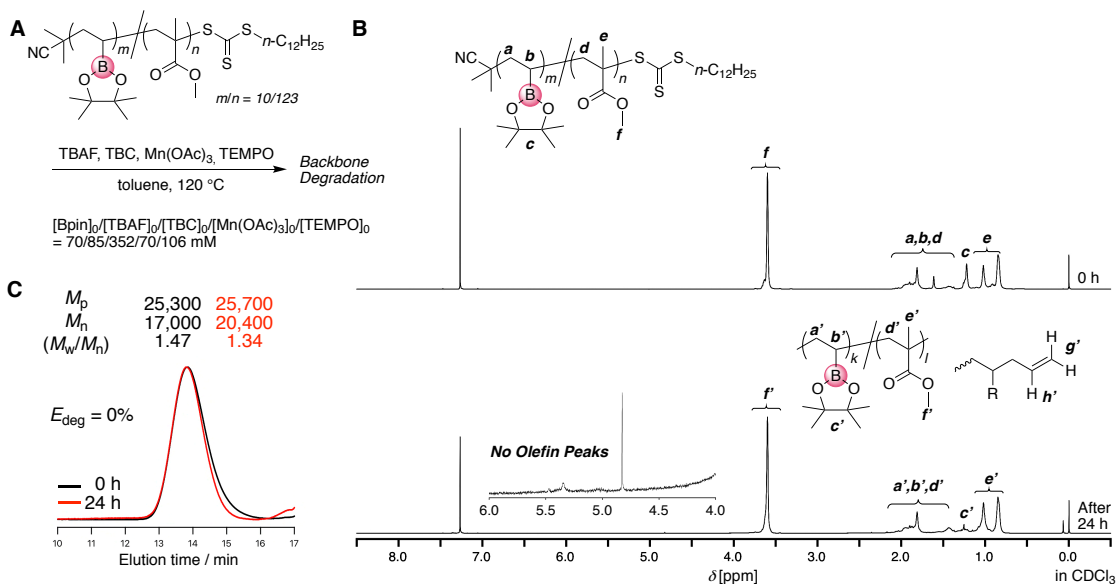

**Figure S16.** (A) Reaction condition for the degradation of poly(VBpin-*co*-MMA) (Figure 2F). (B)  $^1\text{H}$  NMR spectra of the precursor (upper) and the resultant polymer (bottom). (C) SEC traces of the precursor (black) and the resultant polymer (red).

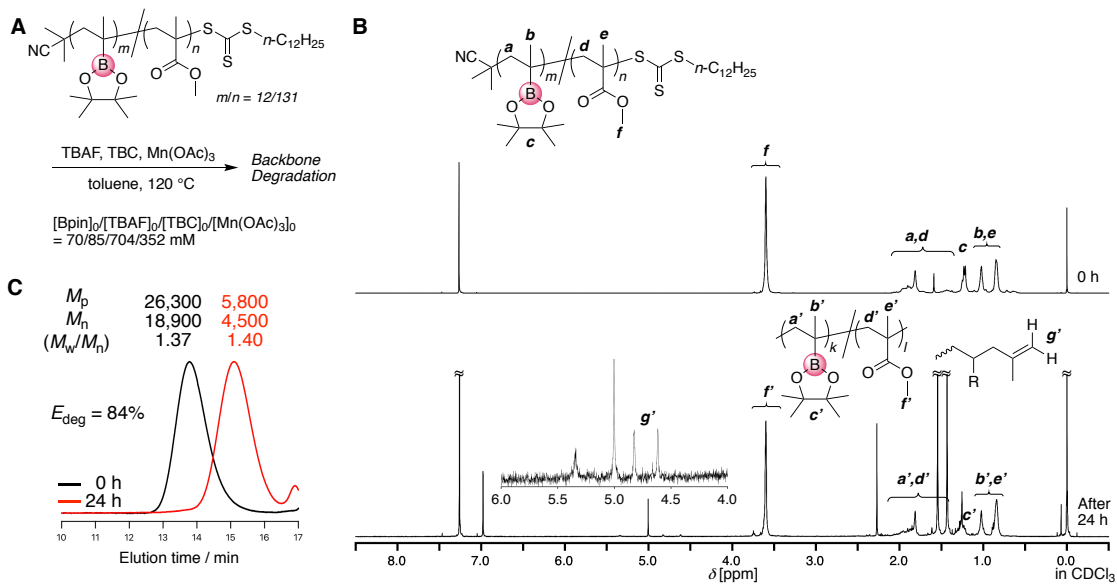

**Figure S17.** (A) Reaction condition for the degradation of poly(IPBpin-*co*-MMA) (Figure 3C). (B)  $^1\text{H}$  NMR spectra of the precursor (upper) and the resultant polymer (bottom). (C) SEC traces of the precursor (black) and the resultant polymer (red).

## 5 Thermal Properties of Obtained Polymers

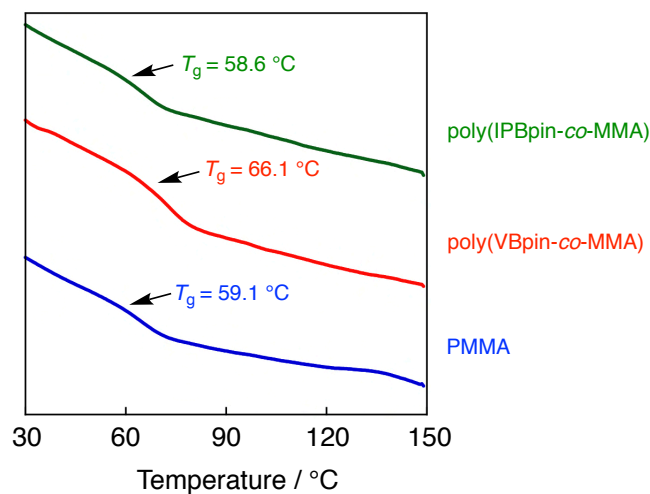

**Figure S18.** DSC curves of poly(IPBpin-co-MMA) ( $M_n = 18,600$ ,  $M_w/M_n = 1.36$ , IPBpin = 9.6%), poly(VBpin-co-MMA) ( $M_n = 17,700$ ,  $M_w/M_n = 1.46$ , VBpin = 7.4%), and PMMA ( $M_n = 17,600$ ,  $M_w/M_n = 1.15$ ).

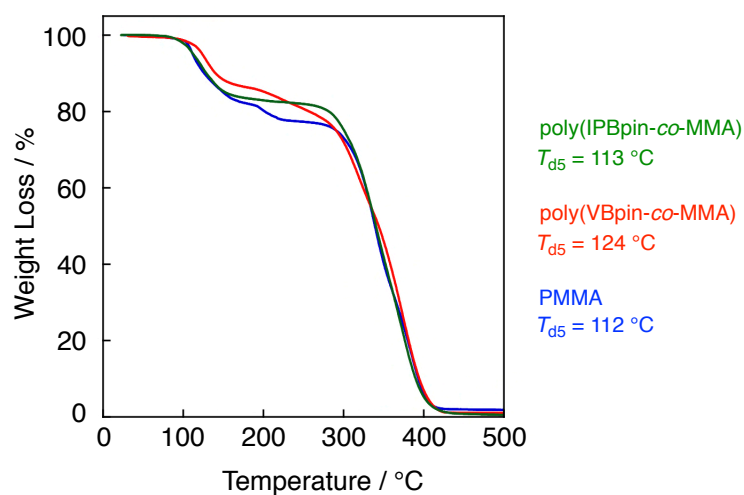

**Figure S19.** TGA curves of poly(IPBpin-co-MMA) ( $M_n = 18,600$ ,  $M_w/M_n = 1.36$ , IPBpin = 9.6%), poly(VBpin-co-MMA) ( $M_n = 17,700$ ,  $M_w/M_n = 1.46$ , VBpin = 7.4%), and PMMA ( $M_n = 17,600$ ,  $M_w/M_n = 1.15$ ).
